# Supplementary material for: Flash Flood warning in context: combining local knowledge and large-scale hydro-meteorological patterns
Source: Copernicus journal article supplement (doi:10.5194/nhess-2021-107), 2021-04-23
Supplement: Supplementary file 1 [file nhess-2021-107-supplement.zip]

Archive with 12 entries (12 files):
- Supplementary materials/3.Materials and methods/3.2_Building_knowledge_data_collection_analysis_Workflow.png
- Supplementary materials/5. Discussion/Table_S5.1_Prediction_model_results.PNG
- Supplementary materials/4.Results/4.2 Geomorphological analysis/Table_S4.2.2_PCA_composite.xlsx
- Supplementary materials/4.Results/4.3 Hydro-meteorological analysis/Table_S4.3.2_FlashFlood_catalogue.xlsx
- Supplementary materials/4.Results/4.2 Geomorphological analysis/Table_S4.2.1_PCA_Indicators.xlsx
- Supplementary materials/4.Results/4.2 Geomorphological analysis/Fig_S4.2.3_PCA_composite_maps.png
- Supplementary materials/4.Results/4.2 Geomorphological analysis/Fig_S4.2.2_Indicators_graph_PCA.png
- Supplementary materials/5. Discussion/Fig_S5.1.2_pred_result.pdf
- Supplementary materials/4.Results/4.3 Hydro-meteorological analysis/Fig_S4.3.1_GSMAP_HourlyP_Jan_Apr.pdf
- Supplementary materials/5. Discussion/Fig_5.1.1_pred_workflow.pdf
- Supplementary materials/4.Results/4.1 Building knowledge on Flash Flooding/FGD_Posters.pdf
- Supplementary materials/3.Materials and methods/3.1_Field_data_collection_program_protocol.pdf
