# Supplementary material for: Flash Flood warning in context: combining local knowledge and large-scale hydro-meteorological patterns
Source: Copernicus journal article supplement (doi:10.5194/nhess-2021-107), 2021-04-23
Supplement: Supplementary file 1 [file nhess-2021-107-supplement.zip › Supplementary materials/4.Results/4.1 Building knowledge on Flash Flooding/FGD_Posters.pdf]

# TA Mwakaboko - Mwakaboko GVH - Iponga River

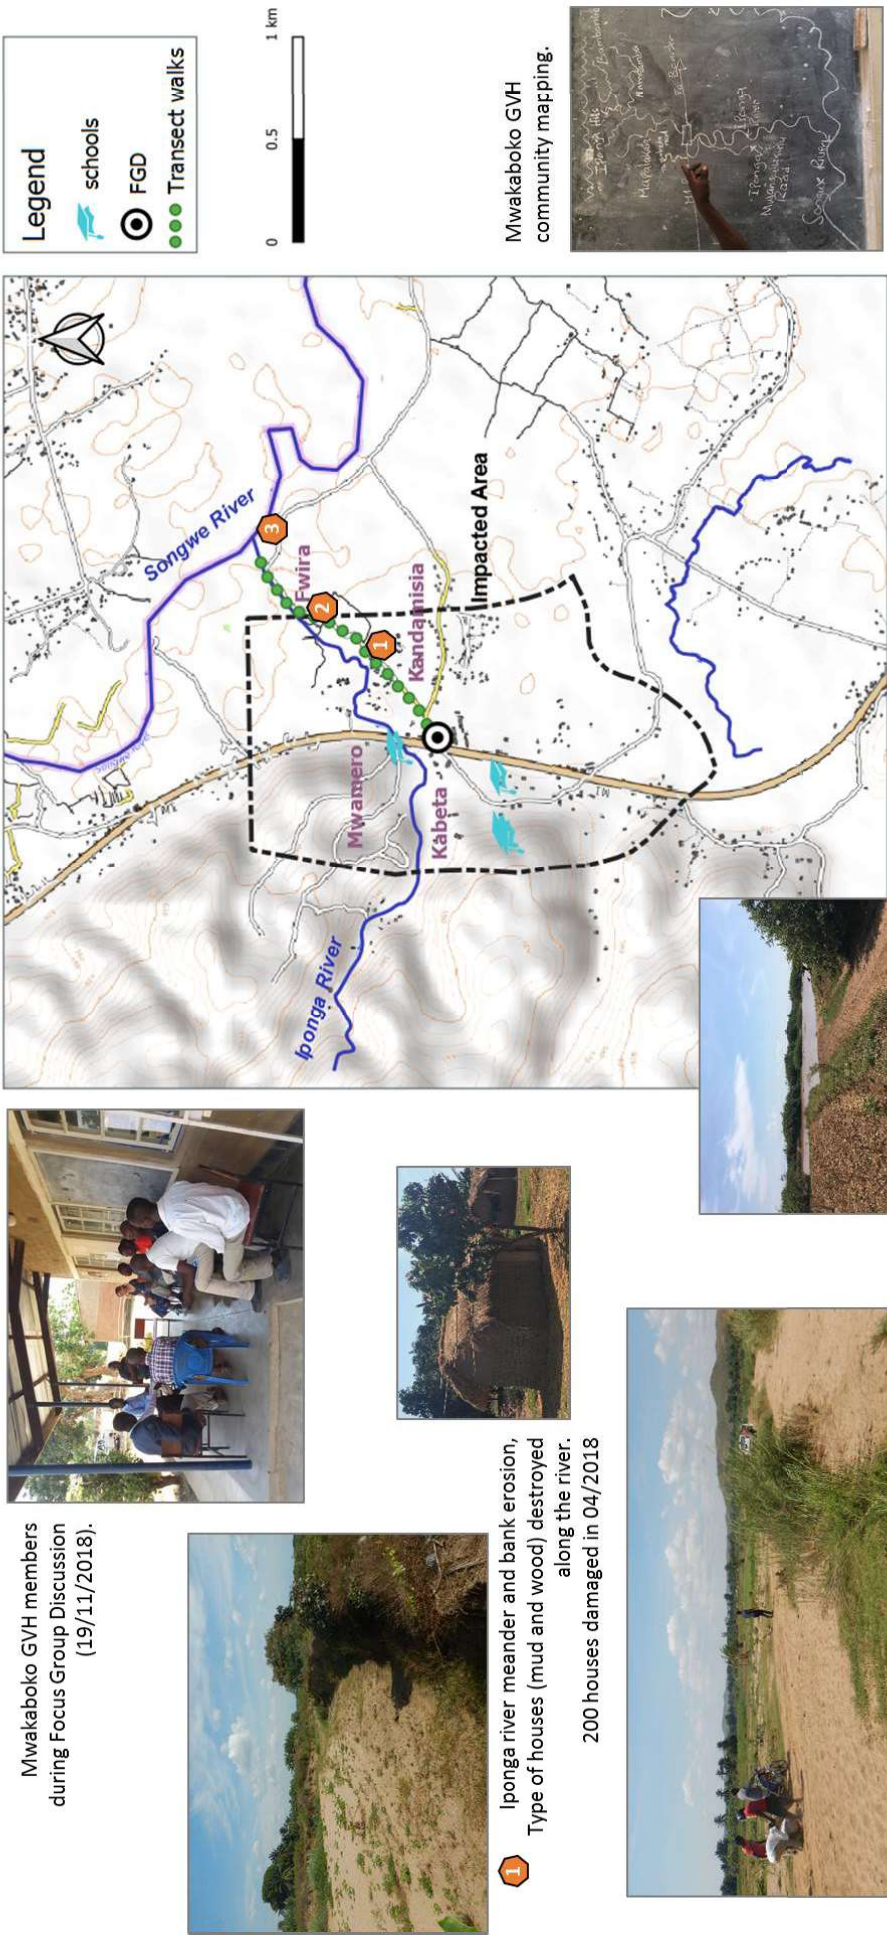

## TA Kyungu/Kilipula - Dumira GVH - Kasoba, Kasisi and Nchoww Rivers

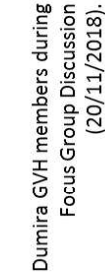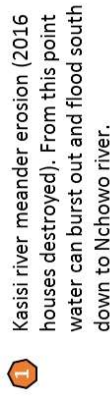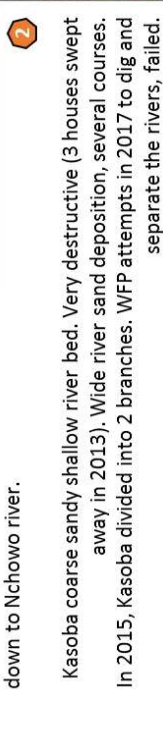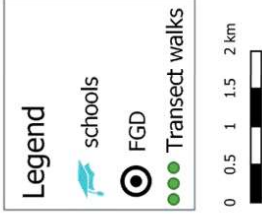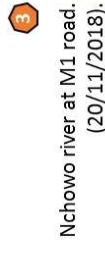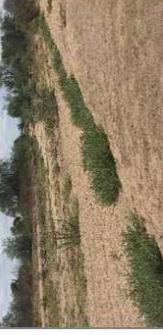

# TA Kyungu - Mwangdwanga GVH - Nkhomi River

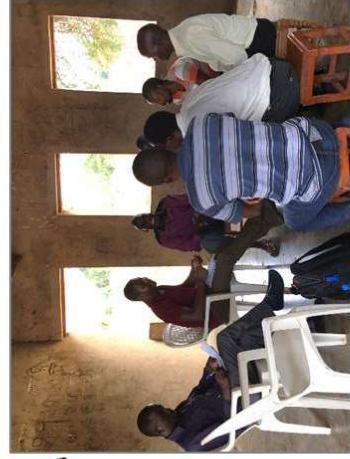

1 Mwangdwanga GVH members during Focus Group Discussion (20/11/2018).

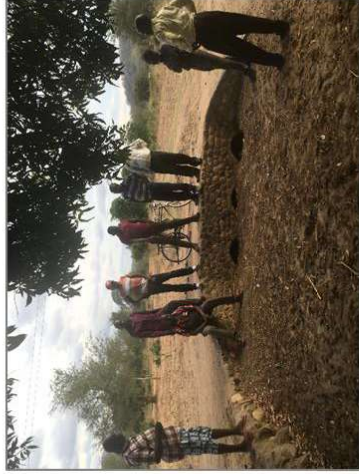

From this point, during floods, water cannot find a way to reach North Rukulu river and floods the entire area around the Stevenson road.

2

Nkomi river culvert built in 2005, filled by sands. (20/11/2018).

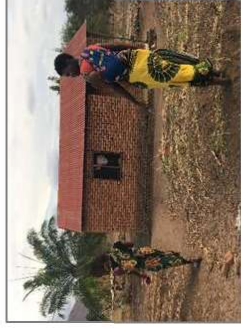

1

Flood mark and vegetation planting along Stevenson Road, transformed as river path during floods. (20/11/2018).

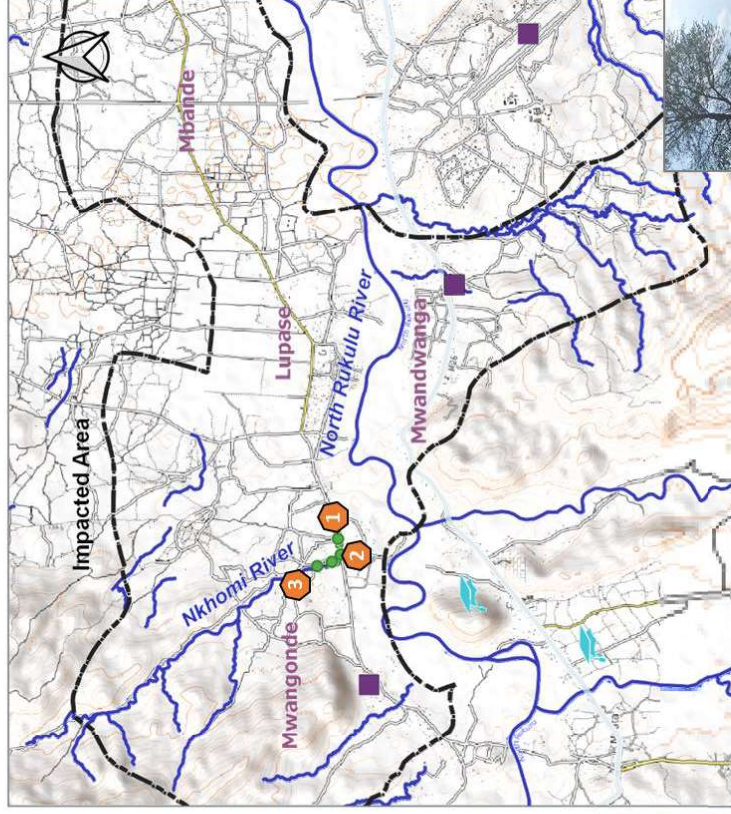

## Legend

- 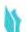 schools
- 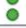 Transect walks
- 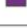 Raingauges

0 0.5 1 1.5 km

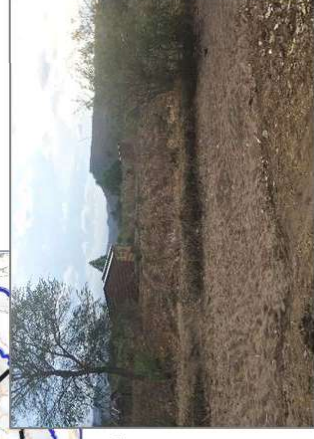

3

Flat Nkhomi river profile and proximity to crop fields .

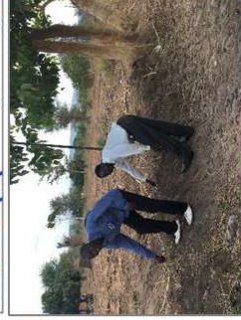

# TA Kyungu - Mwenelupembe GVH - Bwaye River

Mnenelupembe FGD members after community mapping (21/11/2018).

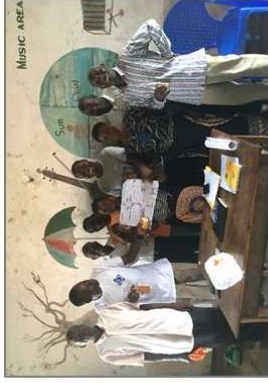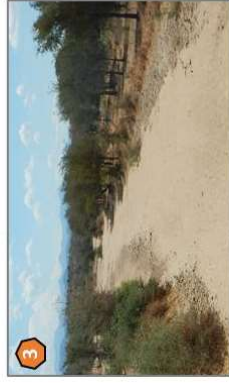

Dry and sandy Bwaye river from M1 bridge (21/11/2018).

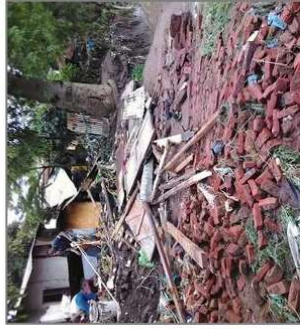

Building Damage on 1/02/2018.

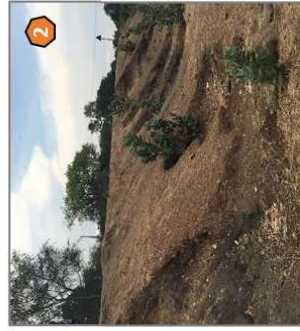

M1 Road Damage on 21/11/2018.

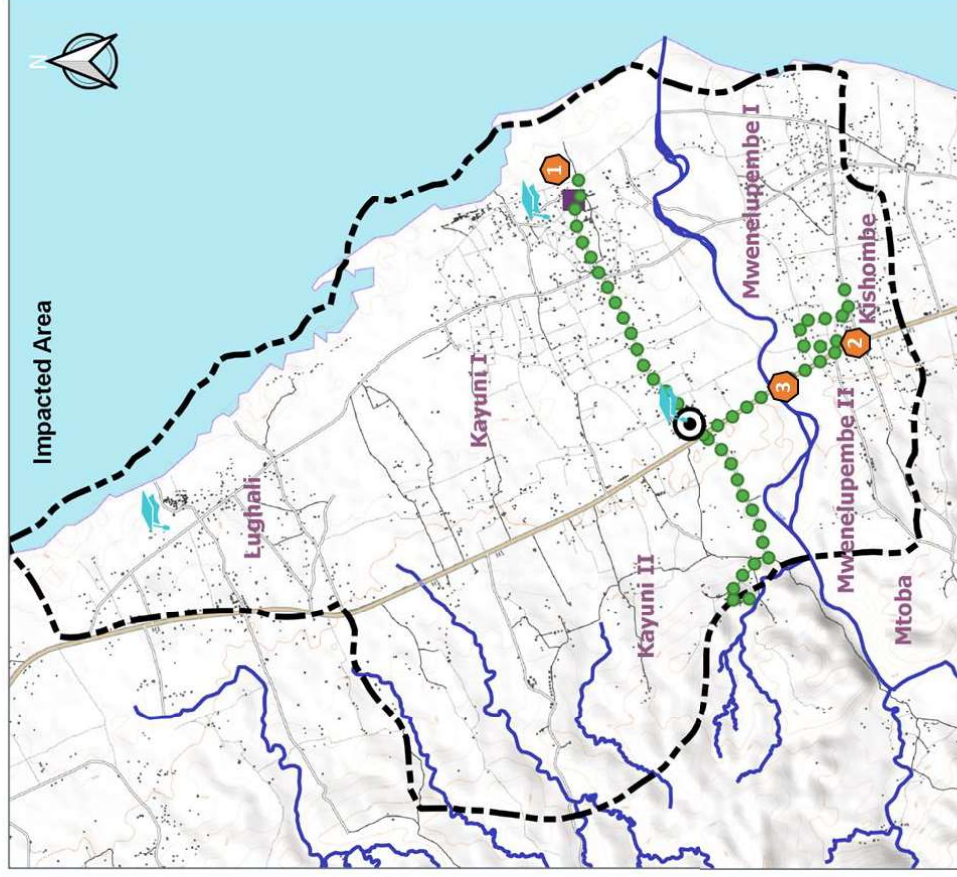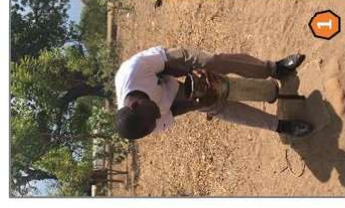

Rain gauge of Mwenelupembe GVH.

Participants have been consulted on being recognisable in the photos

# TA Kyungu - Mwangolera GVH - Lwasho River

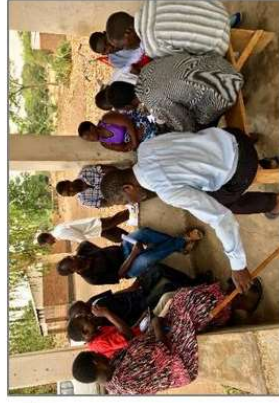

1  
Mwangolera FGD members  
(22/11/2018).

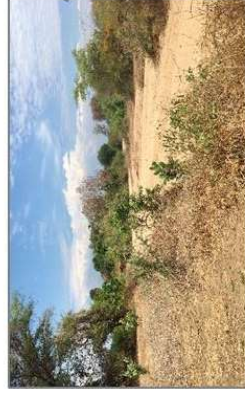

2  
Dry and sandy Lwasho river course (top) and 2013 historical river bank erosion (bottom) (22/11/2018).

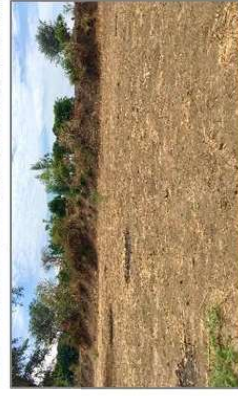

2  
Remain of Flash Flood vegetal debris on trees in Lwasho river course.

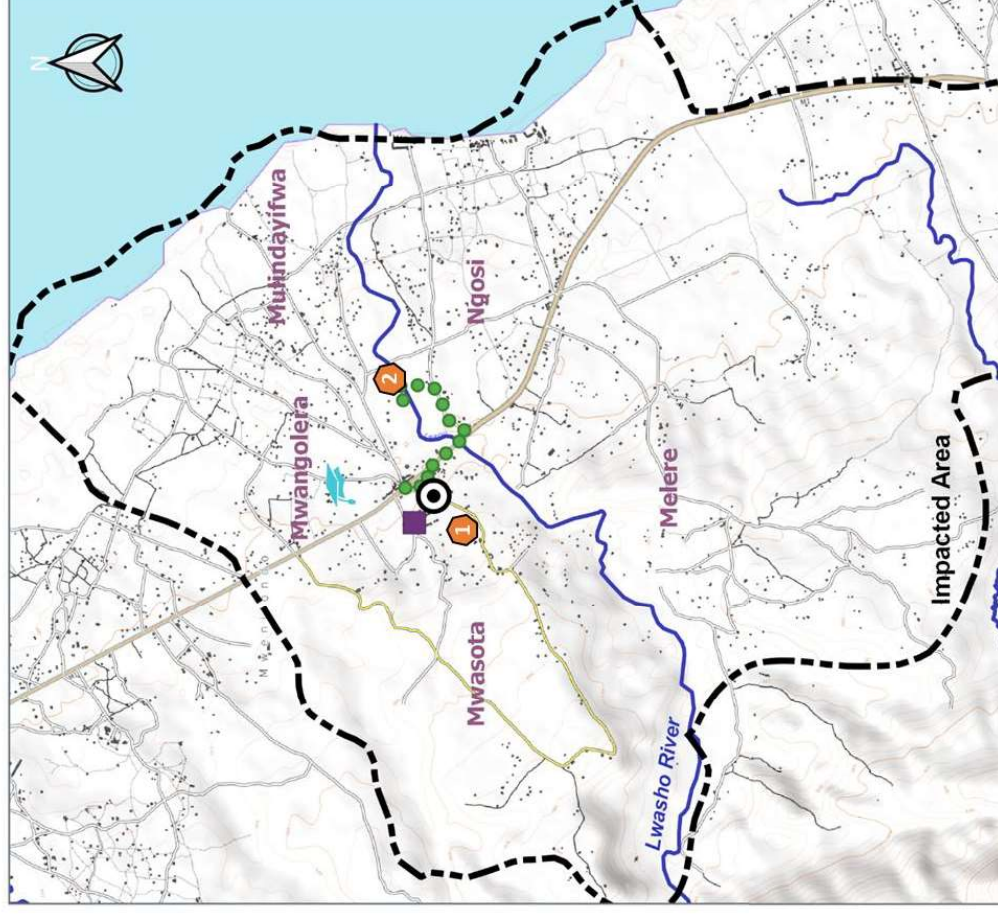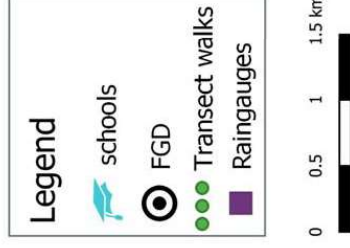

# TA Mwirang'ombe - Mwakashunguti GVH - Sabi River

Mwakashunguti GVH members during Focus Group Discussion (23/11/2018).

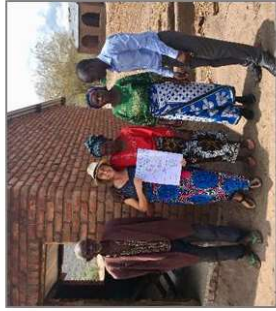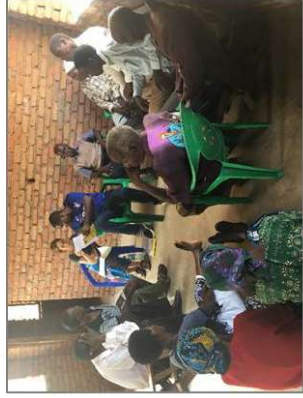

Sabi river with remains of tree debris and flat flood plain used for Cassava, rice and cattle farming

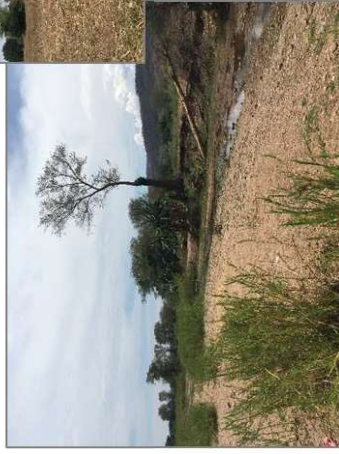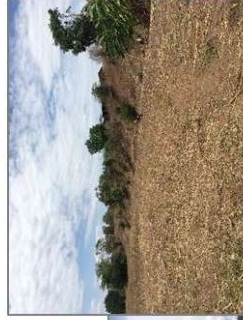

1

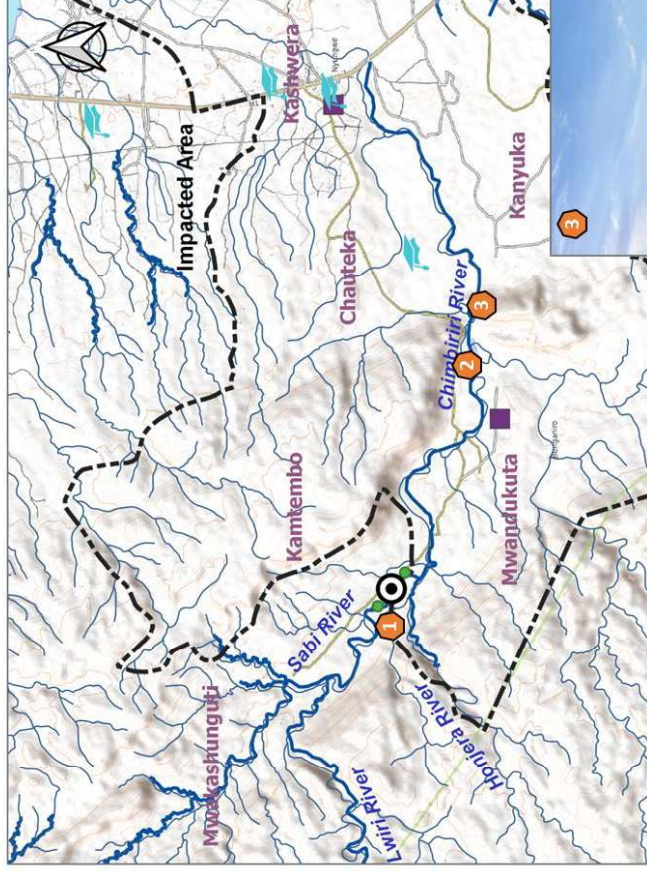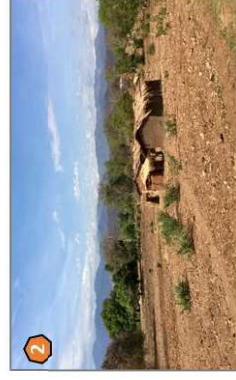

Hilly landscape around Chimbiriri valley and Chibiriri meandering river.

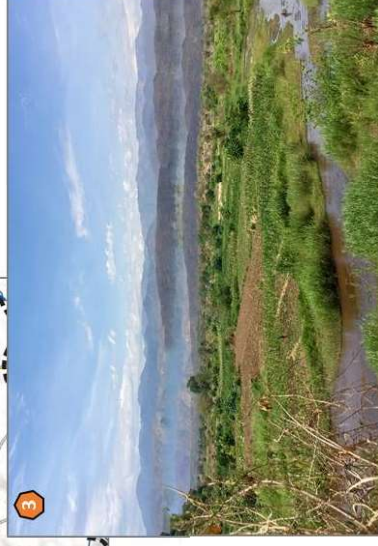

Participants have been consulted on being recognisable in the photos
