# Supplementary material for: Flash Flood warning in context: combining local knowledge and large-scale hydro-meteorological patterns
Source: Copernicus journal article supplement (doi:10.5194/nhess-2021-107), 2021-04-23
Supplement: Supplementary file 1 [file nhess-2021-107-supplement.zip › Supplementary materials/4.Results/4.2 Geomorphological analysis/Table_S4.2.1_PCA_Indicators.xlsx]

## Sheet: Sheet1
Table 4.2.2. Results of the catchment geo-morpho-metric Indicators calculated for each catchment.
Indicators	Symbol	Iponga	Kyungu	Kasantha	Kibwe	Kasisi	Kasoba	Nkhomi	lwasho	Bwaye	kasimba	Remero	Sabi
Area [km2]	Area	3.62695	149.334	19.0006	33.8603	61.006	27.9084	6.85055	58.6338	207.671	27.8619	171.674	335.465
Length to Width [-]	L to W	2.34086	0.511483	2.81792	3.52071	2.91234	0.945551	1.81372	0.342465	0.492933	2.07338	1.93198	1.21669
Time of concentration [min]	Tc	36.554	260.587	120.419	168.735	190.001	103.114	41.264	198.664	202.753	89.352	183.302	234.505
Basin circularity [-]	Cb	0.361691	0.167014	0.195305	0.135063	0.20787	0.224035	0.335851	0.189331	0.269242	0.253397	0.18178	0.300171
Elevation Relief Ratio [-]	elv_RR	0.568963	0.364708	0.56402	0.524946	0.540196	0.478318	0.441576	0.374453	0.274086	0.29803	0.277363	0.361823
Relative elevation ratio [-]	Rel_Relief	0.0188855	0.00829185	0.0100382	0.0114729	0.00976391	0.00839119	0.0147407	0.00958487	0.0150735	0.0133699	0.0158617	0.0155771
Average slope [deg]	Slope	16.0832	12.3182	15.2522	9.86236	10.2245	10.6961	12.5825	9.40948	17.6955	9.1991	17.6797	22.1217
Drainage Relief Ratio [-]	D_RR	0.049	0.024	0.025	0.028	0.024	0.027	0.048	0.023	0.041	0.039	0.05	0.043
Drainage density [Km-1]	Dd	0.742387	0.902472	1.0713	1.11064	0.94025	0.838744	0.817845	0.940469	0.902757	0.915965	0.935761	0.903811
Basin bifurcation ratio [-]	Rb	2	3.86765	3.25	2.91667	3.79167	2.75	3	4.6	4.11847	3.16667	2.91988	3.04299
Mean soil type	Soil_mean	6.09693	5.26883	3.26128	3.68954	3.69473	2.88172	4.24155	3.539	3.59671	4.24889	3.59738	4.66353
NDVI december	NDVI_dec	3.9697	3.72044	4.24581	4.30351	4.7043	4.60236	4.12308	5.10056	5.93825	6.19685	5.43147	4.70386
NDVI march	NDVI_mar	3.30303	2.68905	3.73743	3.29073	3.5448	4.09449	3.58462	3.90317	2.98012	3.93701	2.85787	2.76679
Mean Land Use	LU mean	2.14657	2.01768	2.16516	2.06077	2.40267	3.05407	3	3.38778	2.8767	3.11128	2.6769	2.63736
