# Supplementary material for: Flash Flood warning in context: combining local knowledge and large-scale hydro-meteorological patterns
Source: Copernicus journal article supplement (doi:10.5194/nhess-2021-107), 2021-04-23
Supplement: Supplementary file 1 [file nhess-2021-107-supplement.zip › Supplementary materials/4.Results/4.2 Geomorphological analysis/Table_S4.2.2_PCA_composite.xlsx]

## Sheet: Sheet1
Table 4.2.2. Results of the catchment Principal Component analysis for each of the four classes, as well at the final normalized catchment flash flood susceptibility index.
Catchments	PC[Geometry]	PC[Hypsometry]	PC[Drainage]	PC[Surface]	FF_Susceptibility
Iponga	0.974731	0.846077	1	0.696739	1
Kyungu	0.176472	0.179336	0.131109	0.371231	0.0642748
Kasantha	0.487976	0.235448	0.0888067	0	0.16872
Kibwe	0.178078	0.0890564	0.159443	0.142	0
Kasisi	0.232319	0	0.110013	0.291727	0.0508232
Kasoba	0.798132	0.000830272	0.367527	0.0249683	0.424141
Nkhomi	1	0.438764	0.810539	0.230767	0.788626
Lwasho	0.532827	0.226079	0	0.394443	0.278423
Bwaye	0.350581	0.966557	0.471069	0.720595	0.467469
Kasimba	0.716919	0.210439	0.521432	1	0.697869
Remero	0.180484	0.798143	0.770798	0.533307	0.362035
Sabi	0	1	0.630869	0.564503	0.240133
