# Supplementary material for: Flash Flood warning in context: combining local knowledge and large-scale hydro-meteorological patterns
Source: Copernicus journal article supplement (doi:10.5194/nhess-2021-107), 2021-04-23
Supplement: Supplementary file 1 [file nhess-2021-107-supplement.zip › Supplementary materials/4.Results/4.3 Hydro-meteorological analysis/Fig_S4.3.1_GSMAP_HourlyP_Jan_Apr.pdf]

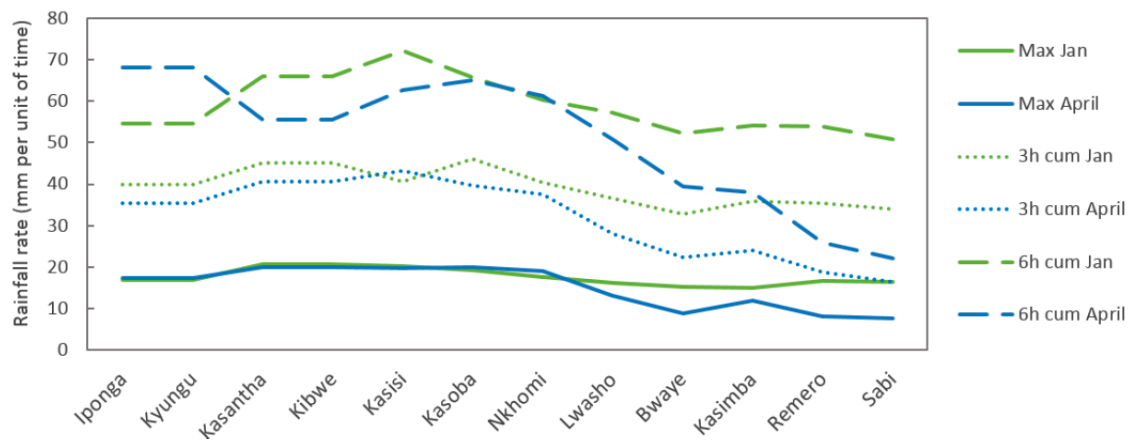

Fig S4.3.1.1: P98 statistical analysis of daily maximum hourly, cumulative 3h and 6h rainfall in January and April, across the 12 catchments of interest in Karonga district. Daily data are averaged monthly over the period 2002-2018.

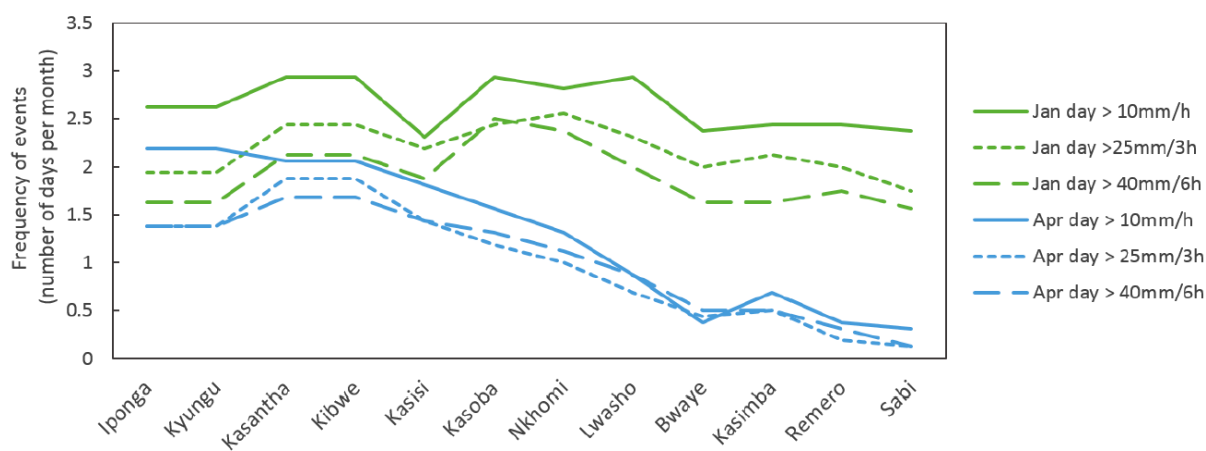

Fig S4.3.1.2: number of days per month exceeding the 10 mm/h, 25mm/3h and 40mm/6h thresholds in the 12 catchments of Karonga (ordered from North to South) in January and in April.
