# Supplementary material for: Flash Flood warning in context: combining local knowledge and large-scale hydro-meteorological patterns
Source: Copernicus journal article supplement (doi:10.5194/nhess-2021-107), 2021-04-23
Supplement: Supplementary file 1 [file nhess-2021-107-supplement.zip › Supplementary materials/4.Results/4.3 Hydro-meteorological analysis/Table_S4.3.2_FlashFlood_catalogue.xlsx]

## Sheet: Sheet1
FF	Season	YEAR	MONTH	Conf	Exact precipitation start date	Exact precipitation time range (UTC)	Duration event	Max intensity	Large/small scale	GSMaP Affected area	Affected Communities
0	2017/2018	2018	April	1	2018-04-10	6pm to 2am	8h	30 mm/h	mid scale	North	Iponga/ Kasoba/Lwasho/Sabi
1	2017/2018	2018	January	1	2018-01-30	7pm to 6am	11h	15mm/h	small scale	South	Kasoba/ Bwaye
2	2017/2018	2018	January	1	2018-01-22	3pm to 5am	14h	10mm/h	large scale	Central South	Sabi
3	2017/2018	2018	January	3	2018-01-12	4pm to 7am	15h	30mm/h	mid scale	North	Nkhomi
4	2016/2017	2017	April	1	2017-04-01	7pm to 4am	9h	30mm/h	Large scale	North	Kasoba/Nkhomi/Lwasho/Sabi
5	2016/2017	2017	January	2	2017-01-06	7pm to 23pm	4h	30 mm/h	mid scale	North	Nkhomi
6	2015/2016	2016	February	2	2016-02-28	4pm to 00am	8h	23mm/h	large scale	South	Sabi
7	2015/2016	2016	January	3	2016-01-31	2pm to 7am	17h	20mm/h	large scale	South	Sabi
8	2014/2015	2015	January	2	2015-01-18	10pm to 11am	13h	7mm/h	large scale	South	Sabi
9	2014/2015	2015	January	2	2015-01-03	2am to7am	5h	30mm/h	mid scale	North	Nkhomi
10	2013/2014	2014	March total	4	2014-03-19	7pm to 3am	8h	30mm/h	mid scale	North	Bwaye
11	2013/2014	2014	february	3	2014-02-24	5pm to 11pm	6h	10mm/h	large scale	Central South	Kasoba
12	2013/2014	2014	January	3	2014-01-30	2pm to 5pm	3h	7mm/h	small scale	Central	Nkhomi/Bwaye
13	2012/2013	2013	March	2	2013-03-26	2pm to 00am	10h	5mm/h	med scacle	North	Lwasho/ Sabi
14	2008/2009	2009	March Total	4	2009-03-08	11pm to 4am	5h	30mm/h	med scacle	All	Sabi
15	2006/2007	2007	January	3	2007-01-22	6pm to 3am	9h	5 mm/h	large scale	Central South	Sabi
16	2005/2006	2006	April	2	2006-05-04	5pm to 4am	11h	17 mm/h	large scale	Central North	Nkhomi
17	2003/2004	2004	January	3	2004-01-27	11am to 2pm	3h	6 mm/h	mid scale	Central South	Sabi
