# Supplementary material for: Flash Flood warning in context: combining local knowledge and large-scale hydro-meteorological patterns
Source: Copernicus journal article supplement (doi:10.5194/nhess-2021-107), 2021-04-23
Supplement: Supplementary file 1 [file nhess-2021-107-supplement.zip › Supplementary materials/5. Discussion/Fig_S5.1.2_pred_result.pdf]

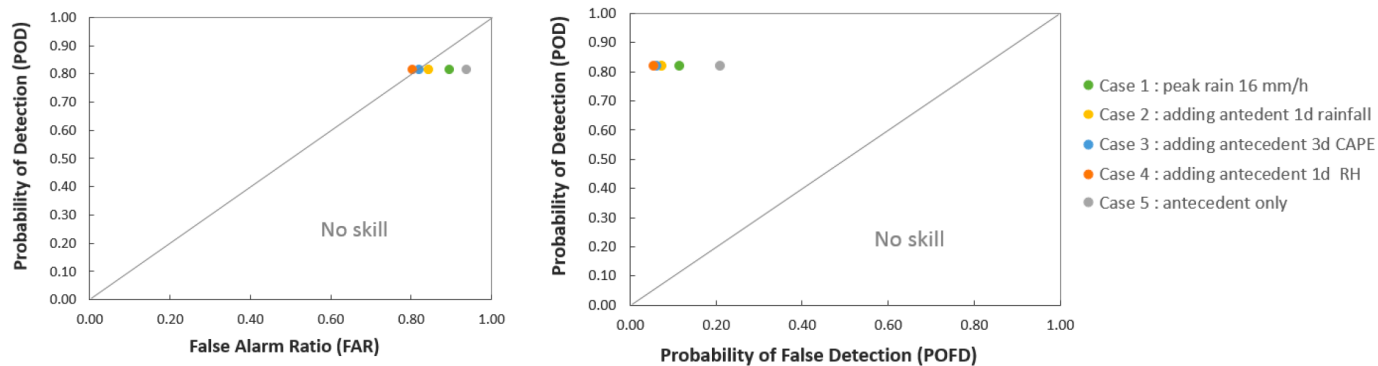

Fig S5.1.2.a: ROC graphs illustrating the performance of the five reference cases, at district scale. Case 1 is using only hourly maximum rainfall, Case 2 is adding antecedent 1 day rainfall condition during the late season, Case 3 antecedent 3 days CAPE during the early season, Case 4 antecedent 1 day Relative Humidity and Case 5 only uses antecedent conditions.

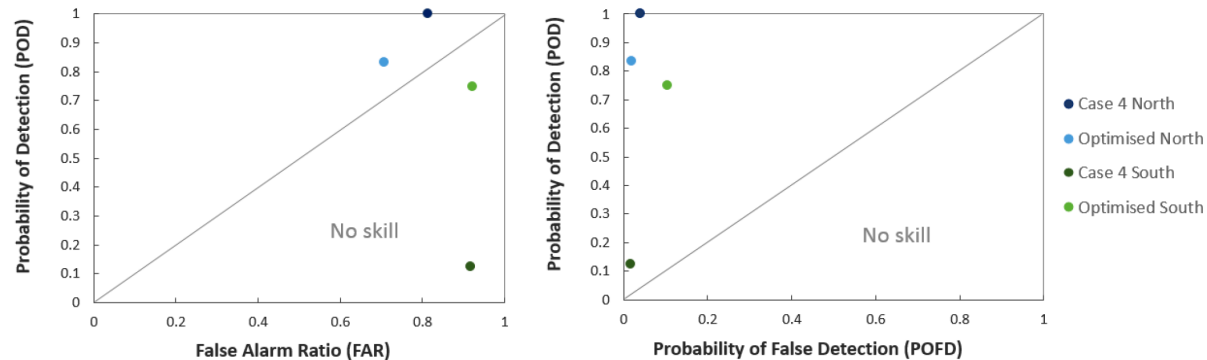

Fig S5.1.2.b: ROC graphs showing the difference of performance of the prediction model between the South and the North of Karonga.
