# Supplementary figures and images for: Flash Flood warning in context: combining local knowledge and large-scale hydro-meteorological patterns
Source: Copernicus journal article supplement (doi:10.5194/nhess-2021-107), 2021-04-23

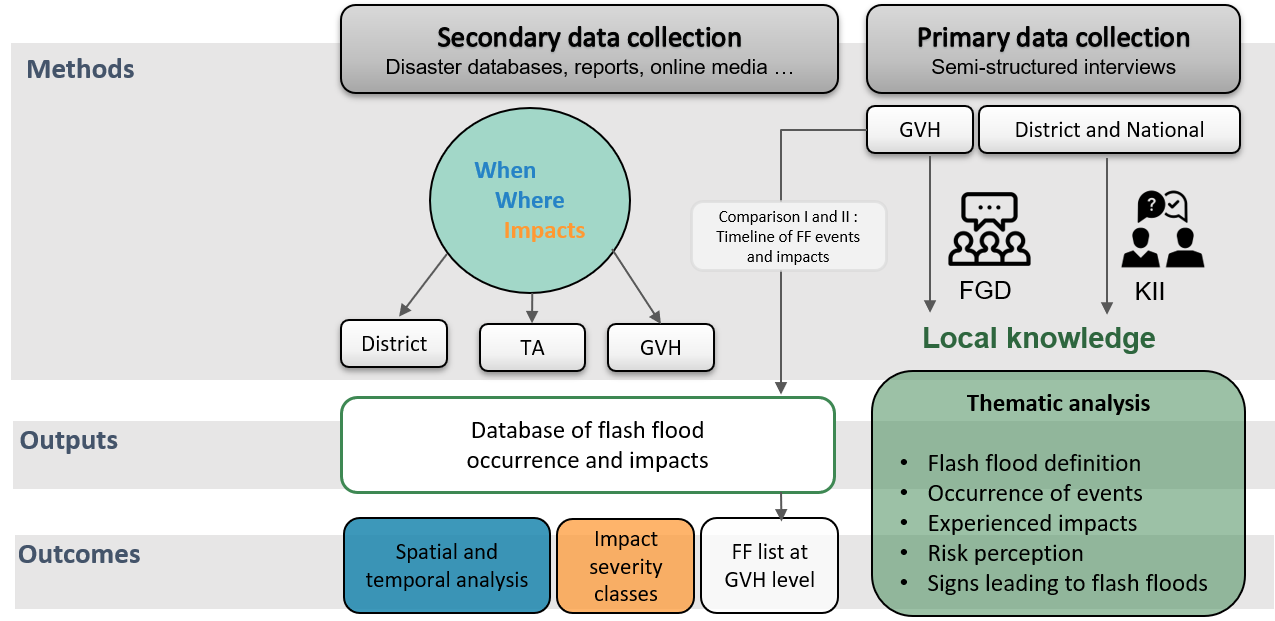

Supplement: Supplementary file 1 [file nhess-2021-107-supplement.zip › Supplementary materials/3.Materials and methods/3.2_Building_knowledge_data_collection_analysis_Workflow.png]

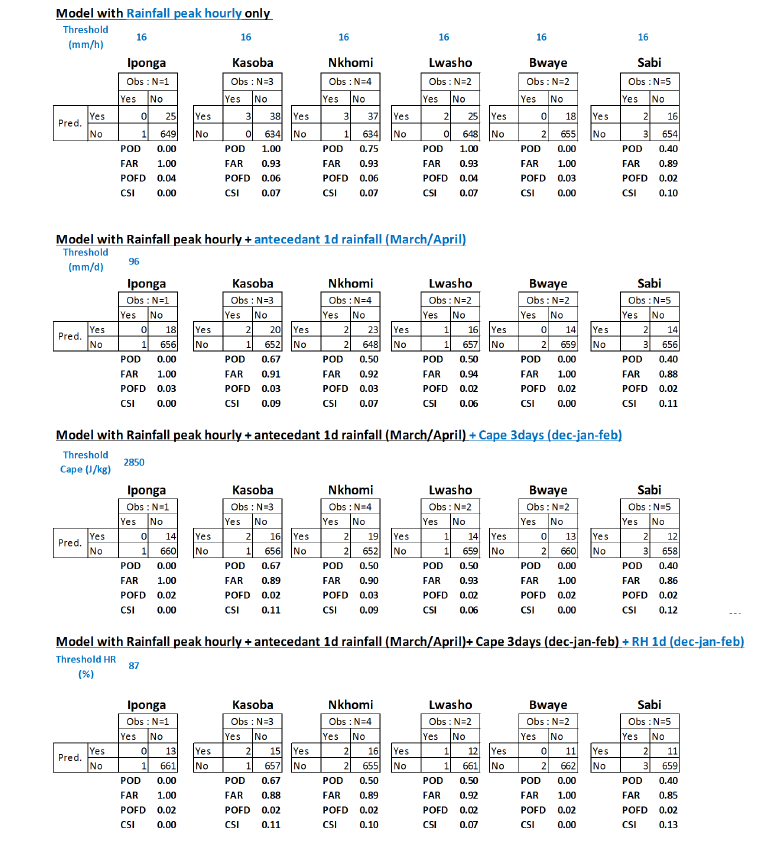

Supplement: Supplementary file 1 [file nhess-2021-107-supplement.zip › Supplementary materials/5. Discussion/Table_S5.1_Prediction_model_results.PNG]

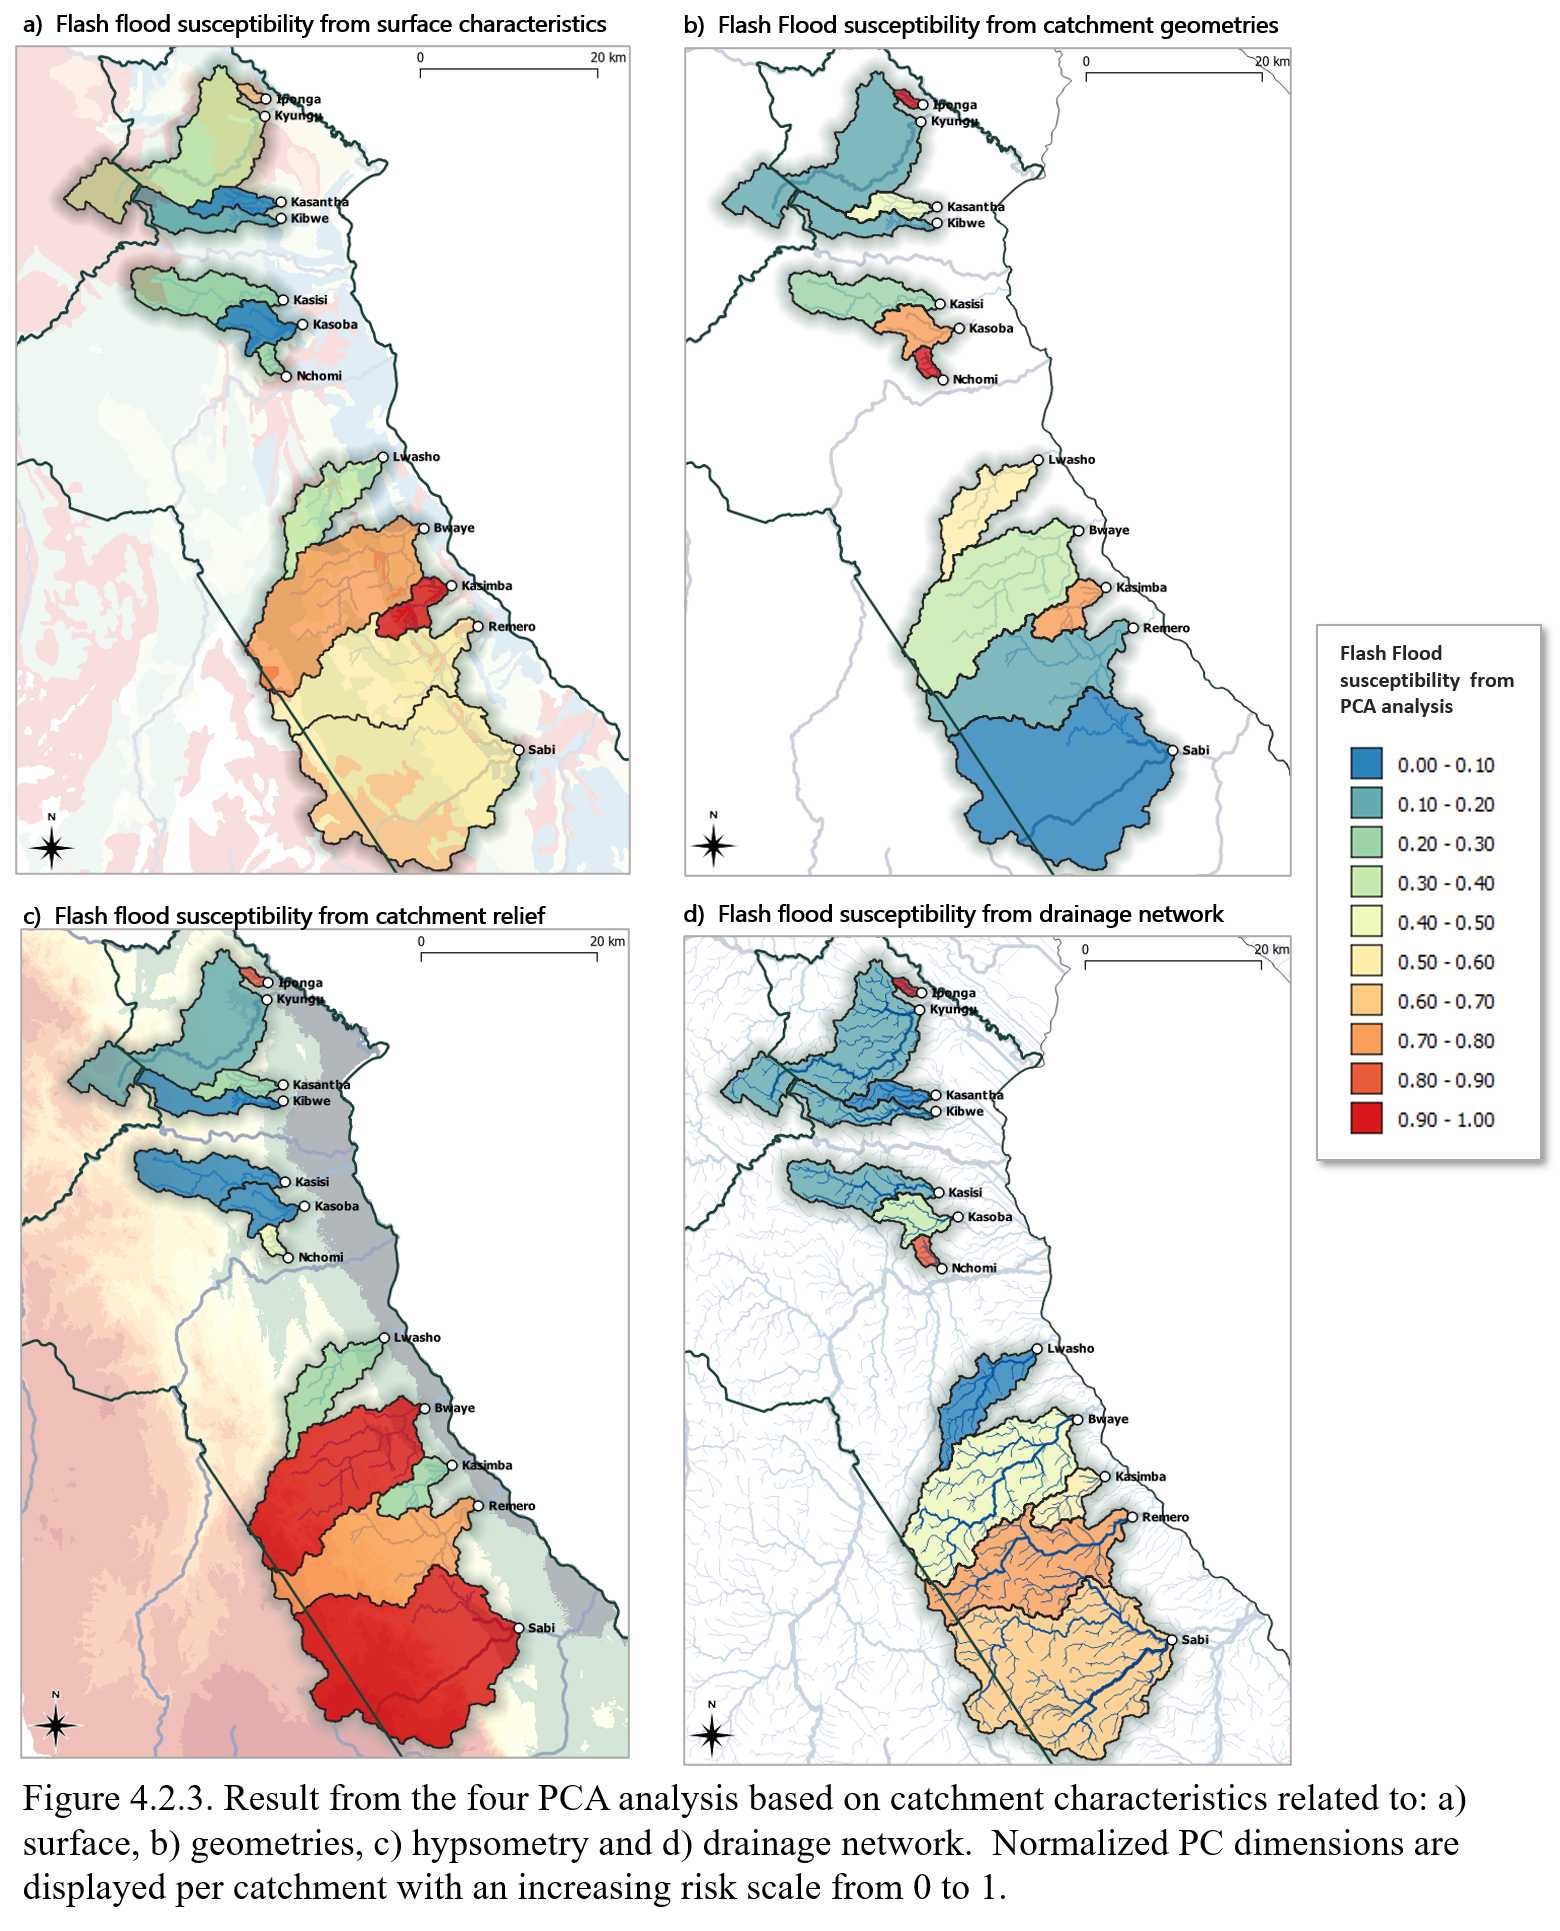

Supplement: Supplementary file 1 [file nhess-2021-107-supplement.zip › Supplementary materials/4.Results/4.2 Geomorphological analysis/Fig_S4.2.3_PCA_composite_maps.png]

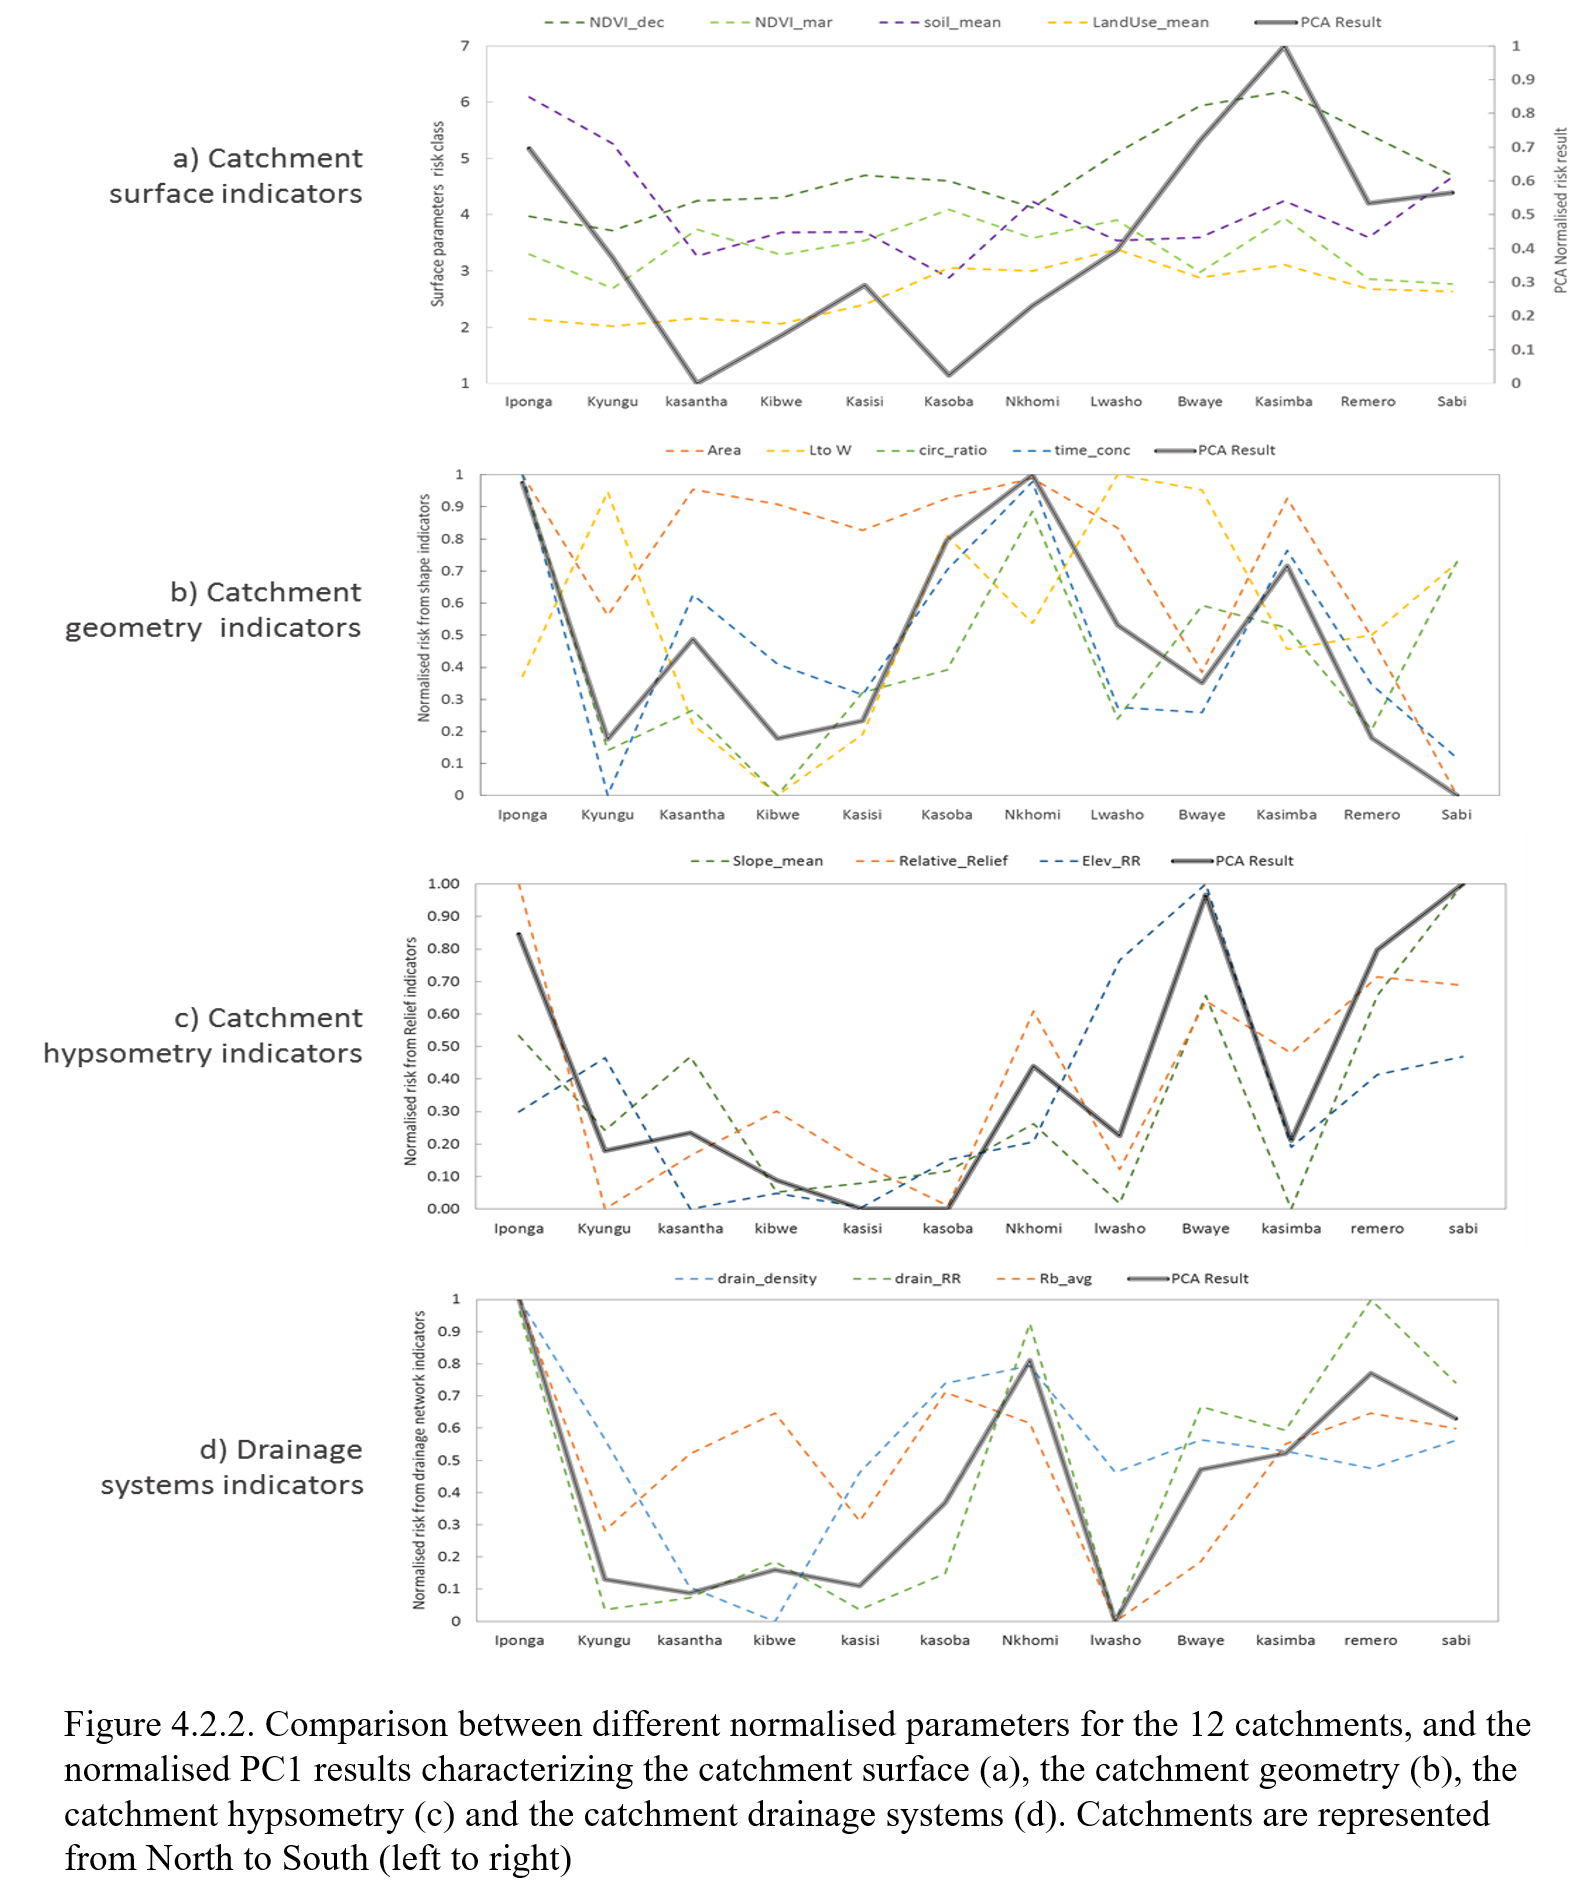

Supplement: Supplementary file 1 [file nhess-2021-107-supplement.zip › Supplementary materials/4.Results/4.2 Geomorphological analysis/Fig_S4.2.2_Indicators_graph_PCA.png]
